# Supplementary material for: Fungal Contamination of Building Materials and the Aerosolization of Particles and Toxins in Indoor Air and Their Associated Risks to Health: A Review
Source: MDPI journal article supplement (doi:10.3390/toxins15030175), 2023-02-25
Supplement: s1 [file s1]

# Fungal Contamination of Building Materials and the Aerosolization of Particles and Toxins in Indoor Air and their Associated Risks to Health: A Review

Mohamad Al Hallak, Thomas Verdier, Alexandra Bertron, Christine Roques and Jean-Denis Bailly

**Table S1.** Fungal species detected on surfaces of materials in different types of buildings according to sampling method, material type, method used for analysis and location of the study.

| Type of building                                                            | Sampling method                   | Surface type                         | Analysis method                              | Species detected                    | Location [Ref] |
|-----------------------------------------------------------------------------|-----------------------------------|--------------------------------------|----------------------------------------------|-------------------------------------|----------------|
| <b>Damp and/or mouldy dwellings (no respiratory problems for occupants)</b> |                                   |                                      |                                              |                                     |                |
| 30 mouldy homes *                                                           | Swab on a 25 cm <sup>2</sup> area | Gypsum, wallpaper                    | DNA sequencing (ITS)                         | <i>Alternaria alternata</i>         | France [75]    |
|                                                                             |                                   |                                      |                                              | <i>Aspergillus versicolor</i>       |                |
|                                                                             |                                   |                                      |                                              | <i>Cladosporium sphaerospermum</i>  |                |
|                                                                             |                                   |                                      |                                              | <i>Penicillium chrysogenum</i>      |                |
|                                                                             |                                   |                                      |                                              | <i>Stachybotrys chartarum</i>       |                |
| 32 mouldy dwellings *                                                       | Swab on a 25 cm <sup>2</sup> area | Wallpaper                            | Morphological identification after culturing | <i>Aspergillus versicolor</i>       | France [76]    |
|                                                                             |                                   |                                      |                                              | <i>Aspergillus niger</i>            |                |
|                                                                             |                                   |                                      |                                              | <i>Aspergillus fumigatus</i>        |                |
|                                                                             |                                   |                                      |                                              | <i>Cladosporium cladosporioides</i> |                |
|                                                                             |                                   |                                      |                                              | <i>Cladosporium sphaerospermum</i>  |                |
|                                                                             |                                   |                                      |                                              | <i>Penicillium chrysogenum</i>      |                |
| 34 mouldy dwellings                                                         | Swab on a 25 cm <sup>2</sup> area | Wallpaper                            | Morphological identification after culturing | <i>Ulocladium chartarum</i>         | Poland [77]    |
|                                                                             |                                   |                                      |                                              | <i>Aspergillus flavus</i>           |                |
|                                                                             |                                   |                                      |                                              | <i>Aspergillus niger</i>            |                |
|                                                                             |                                   |                                      |                                              | <i>Aspergillus versicolor</i>       |                |
|                                                                             |                                   |                                      |                                              | <i>Penicillium chrysogenum</i>      |                |
| Mouldy buildings                                                            | Contact plates                    | Plaster, concrete, wallpaper, gypsum |                                              | <i>Stachybotrys Chartarum</i>       | Denmark [78]   |
|                                                                             |                                   |                                      |                                              | <i>Alternaria tenuissima</i>        |                |
|                                                                             |                                   |                                      |                                              | <i>Aspergillus fumigatus</i>        |                |

|                                            |                                   |                                |                                                                                 |                                                                                                                                                                                                                                                                                                        |              |
|--------------------------------------------|-----------------------------------|--------------------------------|---------------------------------------------------------------------------------|--------------------------------------------------------------------------------------------------------------------------------------------------------------------------------------------------------------------------------------------------------------------------------------------------------|--------------|
|                                            |                                   | & wood                         | Morphological<br>identification after<br>culturing                              | <i>Aspergillus niger</i><br><i>Aspergillus versicolor</i><br><i>Aspergillus wentii</i><br><i>Cladosporium sphaerospermum</i>                                                                                                                                                                           |              |
| 22 mouldy dwellings                        | Scraping:<br>1.5 grams/ sample    | Wallpaper                      | Morphological<br>identification after<br>culturing                              | <i>Acremonium charticola</i><br><i>Aspergillus versicolor</i><br><i>Cladosporium cladosporioides</i><br><i>Penicillium chrysogenum</i>                                                                                                                                                                 | Poland [79]  |
| Mouldy storage room in a<br>family house * | Swab on a 25 cm <sup>2</sup> area | Wood                           | DNA<br>sequencing (ITS)                                                         | <i>Aspergillus penicillioides</i><br><i>Aspergillus subversicolor</i><br><i>Stachybotrys echinata</i><br><i>Sterigmatomyces halophilus</i>                                                                                                                                                             | USA [80]     |
| 60 mouldy dwellings                        | Swab on a 25 cm <sup>2</sup> area | Wallpapers, Wood               | DNA<br>sequencing (ITS)                                                         | <i>Aspergillus unguis</i><br><i>Cladosporium halotolerans</i><br><i>Cyberlindnera jadinii</i>                                                                                                                                                                                                          | USA [67]     |
| 32 mouldy homes *                          | Swab on a 25 cm <sup>2</sup> area | Wallpaper, ceramic<br>and wood | DNA<br>sequencing (ITS)                                                         | <i>Alternaria soliaridae</i><br><i>Aspergillus niger</i><br><i>Aspergillus piperis</i><br><i>Aspergillus versicolor</i><br><i>Cladosporium halotolerans</i><br><i>Cladosporium sphaerospermum</i><br><i>Penicillium aurantiogriseum</i><br><i>Penicillium oxalicum</i><br><i>Stachybotrys echinata</i> | USA [81]     |
| 3 Mouldy homes                             | Swab on a 25 cm <sup>2</sup> area | Brick walls                    | DNA<br>sequencing (ITS) &<br>morphological<br>identification after<br>culturing | <i>Acremonium charticola</i><br><i>Aspergillus canadensis</i><br><i>Aspergillus versicolor</i><br><i>Cladosporium sphaerospermum</i><br><i>Debaryomyces hansenii</i><br><i>Monocillium tenue</i>                                                                                                       | Denmark [82] |

|                  |               |                               |                                                    |                                    |              |
|------------------|---------------|-------------------------------|----------------------------------------------------|------------------------------------|--------------|
| 24 mouldy houses | Not mentioned | Wallpapers,<br>plasters, wood | Morphological<br>identification after<br>culturing | <i>Penicillium roseopurpureum</i>  | Germany [83] |
|                  |               |                               |                                                    | <i>Verrucocladosporium dirinae</i> |              |
|                  |               |                               |                                                    | <i>Acremonium spp</i>              |              |
|                  |               |                               |                                                    | <i>Aspergillus calidoustus</i>     |              |
|                  |               |                               |                                                    | <i>Aspergillus fumigatus</i>       |              |
|                  |               |                               |                                                    | <i>Aspergillus niger</i>           |              |
|                  |               |                               |                                                    | <i>Aspergillus versicolor</i>      |              |
|                  |               |                               |                                                    | <i>Chaetomium spp</i>              |              |
|                  |               |                               |                                                    | <i>Cladosporium spp</i>            |              |
|                  |               |                               |                                                    | <i>Fusarium spp</i>                |              |
|                  |               |                               |                                                    | <i>Penicillium spp</i>             |              |
|                  |               |                               |                                                    | <i>Stachybotrys spp</i>            |              |

| Type of building                                                                        | Sampling method                   | Surface type      | Analysis method                              | Species detected                    | Location [Ref] |
|-----------------------------------------------------------------------------------------|-----------------------------------|-------------------|----------------------------------------------|-------------------------------------|----------------|
| <b>Dwellings with respiratory problems for occupants (no visible mould development)</b> |                                   |                   |                                              |                                     |                |
| 100 dwellings with occupants with respiratory diseases                                  | Contact plates                    | Wallpaper         | Morphological identification after culturing | <i>Aspergillus glaucus</i>          | France [73]    |
|                                                                                         |                                   |                   |                                              | <i>Aspergillus niger</i>            |                |
|                                                                                         |                                   |                   |                                              | <i>Aspergillus versicolor</i>       |                |
|                                                                                         |                                   |                   |                                              | <i>Cladosporium sphaerospermum</i>  |                |
|                                                                                         |                                   |                   |                                              | <i>Stachybotrys chartarum</i>       |                |
| 27 dwellings with occupants with respiratory diseases *                                 | Swab on a 25 cm <sup>2</sup> area | Wallpaper         | Morphological identification after culturing | <i>Aspergillus fumigatus</i>        | France [76]    |
|                                                                                         |                                   |                   |                                              | <i>Aspergillus niger</i>            |                |
|                                                                                         |                                   |                   |                                              | <i>Aspergillus versicolor</i>       |                |
|                                                                                         |                                   |                   |                                              | <i>Cladosporium cladosporioides</i> |                |
|                                                                                         |                                   |                   |                                              | <i>Cladosporium sphaerospermum</i>  |                |
|                                                                                         |                                   |                   |                                              | <i>Penicillium chrysogenum</i>      |                |
| 25 homes with occupants with respiratory diseases *                                     | Swab on a 25 cm <sup>2</sup> area | Gypsum, wallpaper | DNA sequencing (ITS)                         | <i>Alternaria alternata</i>         | France [75]    |
|                                                                                         |                                   |                   |                                              | <i>Aspergillus versicolor</i>       |                |
|                                                                                         |                                   |                   |                                              | <i>Cladosporium sphaerospermum</i>  |                |
|                                                                                         |                                   |                   |                                              | <i>Penicillium chrysogenum</i>      |                |
|                                                                                         |                                   |                   |                                              | <i>Stachybotrys chartarum</i>       |                |
|                                                                                         | Contact plate                     | Wallpaper         |                                              | <i>Aspergillus flavus</i>           | France [84]    |

|                                                         |                                              |                               |
|---------------------------------------------------------|----------------------------------------------|-------------------------------|
| 90 dwellings with occupants with respiratory diseases * | Morphological identification after culturing | <i>Aspergillus fumigatus</i>  |
|                                                         |                                              | <i>Aspergillus niger</i>      |
|                                                         |                                              | <i>Aspergillus versicolor</i> |

| Type of building                                                          | Sampling method                | Surface type              | Analysis method                              | Species detected            | Location [Ref] |
|---------------------------------------------------------------------------|--------------------------------|---------------------------|----------------------------------------------|-----------------------------|----------------|
| Mouldy or damp dwellings where occupants suffer from respiratory problems |                                |                           |                                              |                             |                |
| One mouldy building with respiratory health problems for occupants *      | Scraping (Stripping wallpaper) | Wallpaper                 | Morphological identification after culturing | Aspergillus niger           | USA [85]       |
|                                                                           |                                |                           |                                              | Aspergillus sydowii         |                |
|                                                                           |                                |                           |                                              | Stachybotrys chartarum      |                |
|                                                                           |                                |                           |                                              | Ulocladium chartarum        |                |
| 5 mouldy buildings with respiratory health problems for occupants         | Swab on a 25 cm² area          | Plaster, Wallpaper, wood. | Morphological identification after culturing | Aspergillus niger           | USA [9]        |
|                                                                           |                                |                           |                                              | Aspergillus ustus           |                |
|                                                                           |                                |                           |                                              | Penicillium aurantiogriseum |                |
|                                                                           |                                |                           |                                              | Stachybotrys chartarum      |                |
| 12 mouldy dwellings with respiratory health problems for occupants        | Swab on a 25 cm² area          | Wallpaper, wood.          | DNA sequencing (β-tubulin)                   | Acremonium strictum         | Belgium [86]   |
|                                                                           |                                |                           |                                              | Aspergillus flavus          |                |
|                                                                           |                                |                           |                                              | Aspergillus fumigatus       |                |
|                                                                           |                                |                           |                                              | Aspergillus sydowii         |                |
|                                                                           |                                |                           |                                              | Aspergillus versicolor      |                |
|                                                                           |                                |                           |                                              | Chaetomium murarum          |                |
|                                                                           |                                |                           |                                              | Cladosporium sphaerospermum |                |

|                                                                              |                       |           |                                                    |                               |             |
|------------------------------------------------------------------------------|-----------------------|-----------|----------------------------------------------------|-------------------------------|-------------|
| 1012 mouldy dwellings<br>with respiratory health<br>problems for occupants * | Swab on a 25 cm² area | Wallpaper | Morphological<br>identification after<br>culturing | <i>Ulocladium botrytis</i>    | France [72] |
|                                                                              |                       |           |                                                    | <i>Acremonium spp</i>         |             |
|                                                                              |                       |           |                                                    | <i>Alternaria alternata</i>   |             |
|                                                                              |                       |           |                                                    | <i>Aspergillus flavus</i>     |             |
|                                                                              |                       |           |                                                    | <i>Aspergillus fumigatus</i>  |             |
|                                                                              |                       |           |                                                    | <i>Aspergillus niger</i>      |             |
|                                                                              |                       |           |                                                    | <i>Aspergillus ochraceus</i>  |             |
|                                                                              |                       |           |                                                    | <i>Aspergillus versicolor</i> |             |
|                                                                              |                       |           |                                                    | <i>Cladosporium spp</i>       |             |
|                                                                              |                       |           |                                                    | <i>Penicillium spp</i>        |             |
|                                                                              |                       |           |                                                    | <i>Stachybotrys spp</i>       |             |

| Type of building                                                                           | Sampling method                   | Surface type       | Analysis method                              | Species detected                    | Location [Ref] |
|--------------------------------------------------------------------------------------------|-----------------------------------|--------------------|----------------------------------------------|-------------------------------------|----------------|
| Normal buildings (no dampness, no visible mould and no respiratory problems for occupants) |                                   |                    |                                              |                                     |                |
| 31 dwellings                                                                               | Swab on a 25 cm <sup>2</sup> area | Walls and ceilings | Morphological identification after culturing | <i>Aspergillus niger</i>            | USA [87]       |
|                                                                                            |                                   |                    |                                              | <i>Aspergillus versicolor</i>       |                |
|                                                                                            |                                   |                    |                                              | <i>Stachybotrys chartarum</i>       |                |
| 59 dwellings *                                                                             | Swab on a 25 cm <sup>2</sup> area | Wallpaper          | Morphological identification after culturing | <i>Aspergillus fumigatus</i>        | France [76]    |
|                                                                                            |                                   |                    |                                              | <i>Aspergillus niger</i>            |                |
|                                                                                            |                                   |                    |                                              | <i>Aspergillus versicolor</i>       |                |
|                                                                                            |                                   |                    |                                              | <i>Cladosporium cladosporioides</i> |                |
|                                                                                            |                                   |                    |                                              | <i>Cladosporium sphaerospermum</i>  |                |
|                                                                                            |                                   |                    |                                              | <i>Penicillium chrysogenum</i>      |                |
| 55 control homes *                                                                         | Swab on a 25 cm <sup>2</sup> area | Gypsum, wallpaper  | DNA sequencing (ITS)                         | <i>Ulocladium chartarum</i>         | France [75]    |
|                                                                                            |                                   |                    |                                              | <i>Alternaria alternata</i>         |                |
|                                                                                            |                                   |                    |                                              | <i>Aspergillus versicolor</i>       |                |
|                                                                                            |                                   |                    |                                              | <i>Cladosporium sphaerospermum</i>  |                |
|                                                                                            |                                   |                    |                                              | <i>Penicillium chrysogenum</i>      |                |
| 10 buildings *                                                                             | Scraping                          | Plasters, ceilings | Morphological identification after culturing | <i>Stachybotrys chartarum</i>       | Slovakia [66]  |
|                                                                                            |                                   |                    |                                              | <i>Alternaria alternata</i>         |                |
|                                                                                            |                                   |                    |                                              | <i>Aspergillus flavus</i>           |                |
|                                                                                            |                                   |                    |                                              | <i>Aspergillus parasiticus</i>      |                |
|                                                                                            |                                   |                    |                                              | <i>Cladosporium herbarum</i>        |                |
|                                                                                            |                                   |                    |                                              | <i>Cladosporium sphaerospermum</i>  |                |
|                                                                                            |                                   |                    |                                              | <i>Fusarium verticillioides</i>     |                |
|                                                                                            |                                   |                    |                                              | <i>Penicillium verrucosum</i>       |                |

|                                            |                                                              |                                |                                                                                 |                                     |               |
|--------------------------------------------|--------------------------------------------------------------|--------------------------------|---------------------------------------------------------------------------------|-------------------------------------|---------------|
| 51 rooms in university                     | Passive petri plate<br>gravitational<br>dust settling method | Gypsum boards                  | DNA<br>sequencing (ITS) &<br>morphological<br>identification after<br>sampling  | <i>Alternaria alternata</i>         | Canada [88]   |
|                                            |                                                              |                                |                                                                                 | <i>Aspergillus fumigatus</i>        |               |
|                                            |                                                              |                                |                                                                                 | <i>Aspergillus niger</i>            |               |
|                                            |                                                              |                                |                                                                                 | <i>Aspergillus versicolor</i>       |               |
|                                            |                                                              |                                |                                                                                 | <i>Cladosporium</i> spp             |               |
|                                            |                                                              |                                |                                                                                 | <i>Penicillium</i> spp              |               |
|                                            |                                                              |                                |                                                                                 | <i>Stachybotrys chartarum</i>       |               |
| 35 homes *                                 | Swab on a 25 cm² area                                        | Wallpaper,<br>ceramic and wood | DNA<br>sequencing (ITS)                                                         | <i>Alternaria soliaridae</i>        | USA [81]      |
|                                            |                                                              |                                |                                                                                 | <i>Aspergillus niger</i>            |               |
|                                            |                                                              |                                |                                                                                 | <i>Aspergillus piperis</i>          |               |
|                                            |                                                              |                                |                                                                                 | <i>Aspergillus versicolor</i>       |               |
|                                            |                                                              |                                |                                                                                 | <i>Cladosporium halotolerans</i>    |               |
|                                            |                                                              |                                |                                                                                 | <i>Cladosporium sphaerospermum</i>  |               |
|                                            |                                                              |                                |                                                                                 | <i>Penicillium aurantiogriseum</i>  |               |
|                                            |                                                              |                                |                                                                                 | <i>Penicillium oxalicum</i>         |               |
|                                            |                                                              |                                |                                                                                 | <i>Stachybotrys echinata</i>        |               |
| 9 homes                                    | Swab on a 25 cm² area                                        | Wood                           | DNA<br>sequencing (ITS) &<br>Morphological<br>identification after<br>culturing | <i>Acremonium charticola</i>        | Denmark [82]  |
|                                            |                                                              |                                |                                                                                 | <i>Aspergillus domesticus</i>       |               |
|                                            |                                                              |                                |                                                                                 | <i>Aspergillus glaucus</i>          |               |
|                                            |                                                              |                                |                                                                                 | <i>Aspergillus versicolor</i>       |               |
|                                            |                                                              |                                |                                                                                 | <i>Aspergillus vitricola</i>        |               |
|                                            |                                                              |                                |                                                                                 | <i>Cladosporium allicinum</i>       |               |
| 10 higher-education<br>institutes<br>(HEI) | Swab on a 25 cm² area                                        | Wallpapers, wood               | Morphological<br>identification after<br>culturing                              | <i>Cladosporium cladosporioides</i> | Portugal [63] |
|                                            |                                                              |                                |                                                                                 | <i>Penicillium brevicompactum</i>   |               |
|                                            |                                                              |                                |                                                                                 | <i>Penicillium chrysogenum</i>      |               |
|                                            |                                                              |                                |                                                                                 | <i>Saccharomyces cerevisiae</i>     |               |
|                                            |                                                              |                                |                                                                                 | <i>Stachybotrys chartarum</i>       |               |
|                                            |                                                              |                                |                                                                                 | <i>Aspergillus fumigatus</i>        |               |
|                                            |                                                              |                                |                                                                                 | <i>Aspergillus niger</i>            |               |
|                                            |                                                              |                                |                                                                                 | <i>Chrysonilia sitophila</i>        |               |
|                                            |                                                              |                                |                                                                                 | <i>Cladosporium</i> spp             |               |
| <i>Penicillium</i> spp                     |                                                              |                                |                                                                                 |                                     |               |



| Type of building                      | Sampling method                         | Surface type              | Analysis method                              | Species detected                                                                                                                                                                                                    | Location [Ref] |
|---------------------------------------|-----------------------------------------|---------------------------|----------------------------------------------|---------------------------------------------------------------------------------------------------------------------------------------------------------------------------------------------------------------------|----------------|
| <b>Hospitals</b>                      |                                         |                           |                                              |                                                                                                                                                                                                                     |                |
| 19 patient rooms in a hospital *      | Swab on a 25 cm <sup>2</sup> area       | Wallpapers, bed-plastic,  | Morphological identification after culturing | <i>Aspergillus flavus</i><br><i>Aspergillus fumigatus</i><br><i>Aspergillus niger</i>                                                                                                                               | France [89]    |
| 2420 patients' rooms in 3 hospitals * | Swab on a 25 cm <sup>2</sup> area       | Sinks, tables, wallpapers | Morphological identification after culturing | <i>Aspergillus flavus</i><br><i>Aspergillus fumigatus</i><br><i>Aspergillus niger</i><br><i>Candida albicans</i>                                                                                                    | Greece [90]    |
| 15 patient rooms in a hospital *      | Contact plates (Bio contact applicator) | Wallpapers                | Morphological identification after culturing | <i>Aspergillus flavus</i><br><i>Aspergillus fumigatus</i><br><i>Aspergillus glaucus</i><br><i>Aspergillus hiratsukae</i><br><i>Aspergillus niger</i><br><i>Aspergillus terreus</i><br><i>Aspergillus versicolor</i> | France [91]    |
| 4 elderly care centers *              | Swab on a 25 cm <sup>2</sup> area       | Wallpaper                 | Morphological identification after culturing | <i>Aspergillus candidus</i><br><i>Aspergillus fumigatus</i><br><i>Aspergillus niger</i>                                                                                                                             | Portugal [64]  |

| Type of building       | Sampling method                                                           | Surface type                               | Analysis method                              | Species detected                    | Location [Ref] |
|------------------------|---------------------------------------------------------------------------|--------------------------------------------|----------------------------------------------|-------------------------------------|----------------|
| Others                 |                                                                           |                                            |                                              |                                     |                |
| 36 wine cellars *      | Swab on a 25 cm <sup>2</sup> area                                         | Walls (brick or concrete) and wine barrels | Morphological identification after culturing | <i>Absidia macrospora</i>           | Austria [92]   |
|                        |                                                                           |                                            |                                              | <i>Alternaria alternata</i>         |                |
|                        |                                                                           |                                            |                                              | <i>Aspergillus fumigatus</i>        |                |
|                        |                                                                           |                                            |                                              | <i>Aspergillus niger</i>            |                |
|                        |                                                                           |                                            |                                              | <i>Aspergillus versicolor</i>       |                |
|                        |                                                                           |                                            |                                              | <i>Cladosporium cladosporioides</i> |                |
|                        |                                                                           |                                            |                                              | <i>Cladosporium sphaerospermum</i>  |                |
|                        |                                                                           |                                            |                                              | <i>Fusarium solani</i>              |                |
|                        |                                                                           |                                            |                                              | <i>Penicillium chrysogenum</i>      |                |
|                        |                                                                           |                                            |                                              | <i>Penicillium olsonii</i>          |                |
| 3 archives buildings * | Swab on a 25 cm <sup>2</sup> area                                         | Wallpaper, wood                            | Morphological identification after culturing | <i>Walleimia sebi</i>               | Portugal [93]  |
|                        |                                                                           |                                            |                                              | <i>Zasmidium cellare</i>            |                |
|                        |                                                                           |                                            |                                              | <i>Aspergillus fumigatus</i>        |                |
|                        |                                                                           |                                            |                                              | <i>Aspergillus niger</i>            |                |
| 6 museums *            | Swabbing on a 25 cm <sup>2</sup> area and by using contact plates samples | Shelves, walls and historical objects      | Morphological identification after culturing | <i>Aspergillus versicolor</i>       | Poland [94]    |
|                        |                                                                           |                                            |                                              | <i>Stachybotrys chartarum</i>       |                |
|                        |                                                                           |                                            |                                              | <i>Aspergillus flavus</i>           |                |
|                        |                                                                           |                                            |                                              | <i>Aspergillus fumigatus</i>        |                |
|                        |                                                                           |                                            |                                              | <i>Aspergillus niger</i>            |                |
|                        |                                                                           |                                            |                                              | <i>Aspergillus ochraceus</i>        |                |
|                        |                                                                           |                                            |                                              | <i>Aspergillus parasiticus</i>      |                |
|                        |                                                                           |                                            |                                              | <i>Aspergillus versicolor</i>       |                |

|          |                                   |      |                                                    |                                 |               |
|----------|-----------------------------------|------|----------------------------------------------------|---------------------------------|---------------|
|          |                                   |      |                                                    | <i>Cladosporium herbarum</i>    | Slovakia [95] |
|          |                                   |      |                                                    | <i>Penicillium carheum</i>      |               |
| Museum * | Swab on a 25 cm <sup>2</sup> area | Wood | Morphological<br>identification after<br>culturing | <i>Aspergillus ustus</i>        |               |
|          |                                   |      |                                                    | <i>Aspergillus versicolor</i>   |               |
|          |                                   |      |                                                    | <i>Chaetomium globosum</i>      |               |
|          |                                   |      |                                                    | <i>Penicillium citrinum</i>     |               |
|          |                                   |      |                                                    | <i>Penicillium copticola</i>    |               |
|          |                                   |      |                                                    | <i>Penicillium sclerotiorum</i> |               |
|          |                                   |      |                                                    | <i>Penicillium spinulosum</i>   |               |

\*: Studies in which both air sampling and surface sampling were carried out
